# Supplementary material
Source: PubMed Central journal article supplement (PMC3462640)
Supplement: supp_tpc.112.102475_tpc102475Supplemental.pdf [file supp_tpc.112.102475_tpc102475Supplemental.pdf]

```

At-LYP1  ---METSCTLLGLLVSLSFFLLTSLAQ---MTGNFNCS--GSTSTCQSLVGYSSKNATTLRNIQTFLAVKNLRSILG-ANNLPLNTRDQRVNPQVVRVPIHCSCSNQTGVSNRDIE 109
At-LYP2  -----MKNPEKPLLLF---LILASSLASMATAKSTIEPCSSKDTICNSLLGYTLYDLKVEVASLFQVDPVSMLLSNSIDISYDPVENHVLPAKFLFKIPITCSCVDGIRKSL-TH 108
At-LYP3  -----MKIPEKPIFLIFVSLILASSLTFTATAKSTIEPCSSNDTCNALLGYTLYDLKVEVASLFQVDPVSMLLSNSIDISYDPVENHVLPAKFLFKIPITCSCVDGIRKSL-TH 111
Os-LYP1  MASLTAALATPAAAAILLLVLLAAPAS-----AANFTC--AVASGTTCKSAILYTSFNATTYGNLVARFNTTLPDLLG-ANGLPDGTLSSAPVAANSTVKIPFRRCRCNGDVGGSDRLPI 112
Os-LYP2  ---MVPFSFSSAAAAILLLVLLASSAS-----ATNFTC--TWP--TTCQSAIVYTPPAATTYIELLSSEFTTTLRDLFD-ANGLPPTPSTHTAIPTNATVIVPFRCSCVAGANRPESQPF 107
Os-LYP3  ---MTAAMAPPQLVSVLVALLCVAAASPAGVGAARFVFNATAPRASTCQALVAYAPPNATTLAAVRLALFQLRSHRALLA-SHGLPLSTPPSAPAPSPERVRLP--CLCSGGAGATFORPT 114
Os-LYP4  ---MPPPLLLLLL---LAAAAAIVAPARSKSTLESCSSSTACPALLSYTYADLKLAEALALFSAADPLAIIAANSIDFAVDPADRIPLAGLPLRVLPVPCACSDGIRRVTT-VR 107
Os-LYP5  ---MAGVCSVAAAAAMVV---VVMVSSLPGGVEAKTTIEPCTGSDSCSALLGYTLYADMVSEVAALFGTDPAAALLAANALDFGAPGAHRIILPMGLFVRVTRCSCDTGVRKSVS-VR 114
Os-LYP6  ---MAG--WPAEEAAGALV---VAILAAAAGGAAGKTTIEPCAGADTCAALLGYTLYADMVSEVAALFGADPRAVLAANALDFASPGAANRIILPAGLPLRVTRCASCSDGVRKSVVA-VR 111
    
```

LysM

LysM

```

At-LYP1  YTIKKDDILSFVATEIFGGLVTYEKISEVNI--KIPDENKIEIGQKFWIPLPCSCDKLNGE--DVVHYAHVVKLGSSELGEIAAQFGTDNTTLAQINGIIGDSQLLADKPLDVPKACSSS 224
At-LYP2  YKTRTSDTLGSIADSVYGGLVSPQIQVAN---SETDLSVLDVGTKLVIPLPCACFNGTDESLPALYLSYVVRGIDTMAGIAKRFSTSVIDLTVNVMAGAP-DINPGDILAVPLLACSSN 224
At-LYP3  YKTRP SDNLGSIADSVYGGLVSAEQIQEAN---SVNDP SLLDVGTSLVPLPCACFNGTDNLSLPAVYLSYVVKEDITLVGIAARRYSTIITDMMVNMAGAP-DVSSGDILAVPLSACASK 227
Os-LYP1  YVVFQDGLDAIARNVFNAFVITYQELAAAN---NIPDPNKINVSQTLWIPLPCSCDKKEEGS--NVMHLAYSVGKGENTSAAIAKYGVTESTLLTRNKIDDPKIQMGQILLDVPVCRSS 227
Os-LYP2  HIIQINDNMSYIAA-QEDDFVITYQELAAAS---NISHPDFLEVGQELWIPLPCSCDQVEGN--NVTHFAFKVRAADNVSKIAARFVKESTLLKINGITDPKNLTQSQILLDVPV---DY 218
Os-LYP3  YRIRAGDTILDALARGVFAGLVITYQDIAAAN---NVSDPNKIAVGQELWIPVPCSDPVAQG--FVVHYTYVVPVPGASVAALAQDFATTEATVLLALNRMPPDAKSLLAGQVLDVPLRACSSA 229
Os-LYP4  YVARPGDTLASVASSVYGGITTPDWISDSNGILGAKPDAAVDAGTTLFVPLHCACFGVDNGLP AVYLYTVAGKQDTVAAVAQRVYRITATDIMS VNDMATP-ELAAAGDII VVPLPACTSS 226
Os-LYP5  YAAFPADTLATVADGVFAGLAFADQIRNANAVASADPDAPLDPGQKLVPLPCVCFNS SDNNLPAVYLSYVVGVDTPVAIAASYETITVTDVMMVNMAGSP-IAAPGDILAIPLPG---- 229
Os-LYP6  YSARPADTLASVADVVFAGLASADQIRTAGLSAEDPDAPLDAGATLVVPLPCACFNSTDNHNP AVYLSYVVRVGTQVQSI AATHATTVDI SNVNMAGSP-IVAPGDILAIPLPACASM 230
    
```

```

At-LYP1  VRKDSLDAP-LLSNNSYVFTANNVCKCTCDALKNWLSCQSSSEI-KP SNWQTCPPFSQCDGALLN--ASCQRPRDCVYAGYSNQTITFTAS-----PACPDS----- 319
At-LYP2  FPKYATDYG-LIIPNGSYALTAGHCVCQSCVIGSRSMYCEPASISV-SCSSMRCRNSNFMIGNITSQQSSSGCKLITCSYNGFASGTLITLMSLSLQPRCPGQQIAPLIAPPDNPVKEL 342
At-LYP3  FPRYASDFG-LIIPNGSYALAAAGHCVCQSCCALGSRNLYCEPASLAV-SCSSMQRNSNHLMLGNITVQQTSAQCNVITCDYNGIANGTLLTMLTRSLQPRCPGQQFAPLLAPPDTPVRDV 345
Os-LYP1  ISDTSADHNLMLLPDGTGYFTAGNCRCSSTT-YQLNCTAVQNK-GCPSVPLCNG-TLKLGETNG---TGCSTTCAYSYSNSSLIIQTSLATNQIT-----ACQRG----- 327
Os-LYP2  IVTTKPYH----- 226
Os-LYP3  ISSTAIARN-LLVPNGSYILLTANNIMCGCSYIT-WQLDCQPTQGI-SSSFCPASKCGDMFLGHTTSPSTSSCESFACSYAGYTHSTSTFTLLANLTTSTCNAAAMS PMAQQA----- 339
Os-LYP4  FPAFTADYG-LAVANGTYAVTANRCVQCSCGPGNLDLFCVPLADSTCSMOCANSMMNLGNFTLLMTSSGCSVITCSYGGFVNGTLLTLLTALKPQCPCGPHQYPLIPPTSSFFET 345
Os-LYP5  -----TCSSQ-----TLQITIS-----QMSRMVYCIELTVLS----- 255
Os-LYP6  FPNASDYG-LLVANGTYALTAGNVCQSCGPGDLKLYCTP ASLTA-SCSSMQRNSNHLMLGNVTAQSTSGGONVSCSYAGLVNGTITATSLSSGLQPTCPGPHQFPPLRATPIAVNQGS 348
    
```

```

At-LYP1  -----AGPDNYASTLSSSFNFVIVLIQCALICLCLL----- 350
At-LYP2  MYLPSPPSPSPEFDDIAGGSSIAAIVPAAASPGGATVSSNSIPGNPANGPGGSIASCPLSYYSFIALLIPIGSCFFVF-- 423
At-LYP3  MYAPAPSP---DFD---GPGSIASSPRSS---MLPGGGILPGHPANGPAGSISTASASVSYYFITFLIASFSLALSS 416
Os-LYP1  -----GSGRSQFAR---SMWSMSVISFHMVLIICFL----- 356
Os-LYP2  ----- 226
Os-LYP3  -----HSAFRLASTWLRWELIVCLHVIFLCVSVLHHV----- 373
Os-LYP4  YLGPSPTP-----MASE-GGVMAGMAPTS-----TPAASGPPFAG--RHVVGDVLGAFALCLVGNLLW----- 401
Os-LYP5  ----- 255
Os-LYP6  YLAPSPAP-----GAGEAGGDIPFPFGSS-----NVSPANGP SGVSQAASVNRPHQIVALLSVALYFQM-- 409
    
```

Supplemental Figure 1. Amino Acid Sequence Alignment of LYPs in Arabidopsis and Rice.

Full-length amino acid sequences encoded by At-LYP1 (At2g17120), At-LYP2 (At1g77630), At-LYP3 (At1g21880), Os-LYP1 (CEBiP, Os03g04110), Os-LYP2 (Os11g34570), Os-LYP3 (Os09g37600), Os-LYP4 (Os09g27890), Os-LYP5 (Os02g53000) and Os-LYP6 (Os06g10660) were aligned using the ClustalW program. The two characteristic LysMs in these LYPs are indicated by blue lines, and the ω-sites of GPI anchor modification in Os-LYP4 and Os-LYP6 are indicated by red lines.

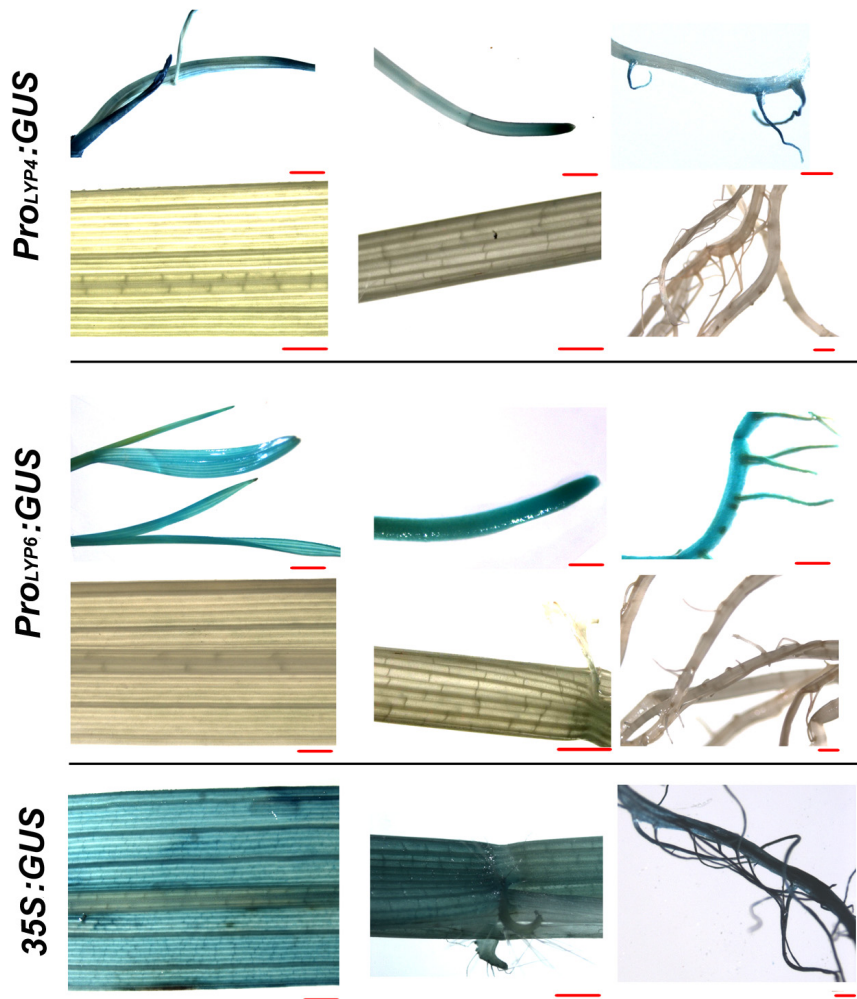

**Supplemental Figure 2. *LYP4* and *LYP6* Are Strongly Expressed in Rice Young Tissues.**

For the indicated *Promoter:GUS* transgenic rice, from top left to bottom right: young leaves from 4-day-old plant, the primary root of 4-day-old plant, and the secondary roots of 6-day-old plant, blades of 4<sup>th</sup> leaves at the 5-leaf stage, leaf sheath at the 5-leaf stage, mature roots at the 5-leaf stage. As a positive control, the GUS staining in mature rice tissues of 35S:*GUS* (pCAMBIA1301) transgenic rice was conducted in parallel, from left to right: blades of 4<sup>th</sup> leaves at the 5-leaf stage, leaf sheath at the 5-leaf stage, mature roots at the 5-leaf stage. Scale bar= 1 mm.

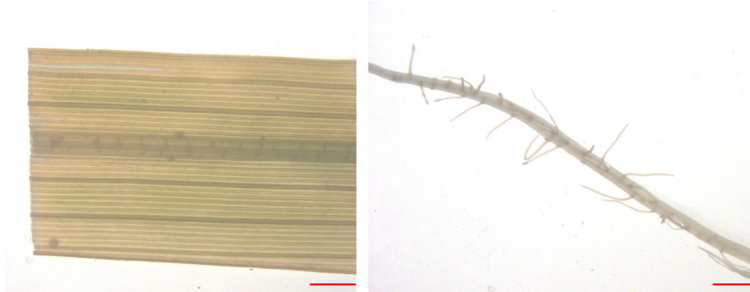

**Supplemental Figure 3. No GUS Activity Is Induced by *X. oryzae* in pCAMBIA-1391Z Empty Vector Transgenic Rice.**

Mature root (primary root in the 5-leaf stage) or leaf (the fourth leaf in the 5-leaf stage) from pCAMBIA-1391Z transgenic rice was immersed into *X. oryzae* suspension ( $10^5$  cells/ml) for 2 hr before GUS staining. The pCAMBIA-1391Z binary plasmid is a promoter capture vector that contains an intact *GUS* gene without promoter. Scale bar = 1 mm.

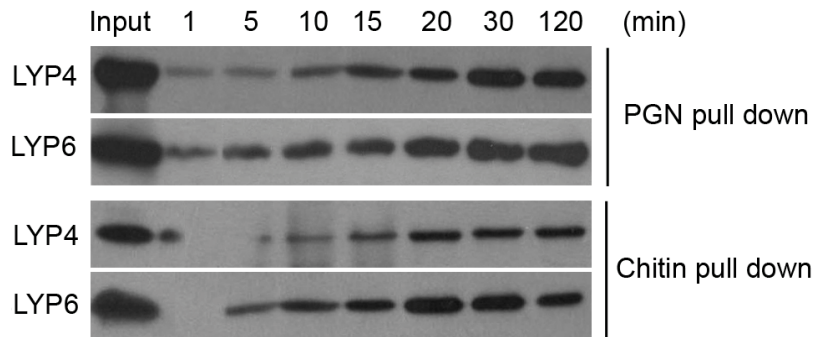

**Supplemental Figure 4. PGN and Chitin Binding Kinetic Analysis for LYP4 and LYP6.**

50  $\mu\text{g}$  of PGN<sub>xoo</sub> or commercial chitin beads (NEB) were used to pull down 1  $\mu\text{g}$  purified 6His-tagged recombinant Os-LYP4 or Os-LYP6 protein in solution after a co-incubation for the indicated period. Note that progressively increasing amounts of LYP proteins were precipitated by either glycan until the binding was saturated in 30 min for PGN<sub>xoo</sub> or in 20 min for chitin. One of the three biological repeats with similar results is shown.

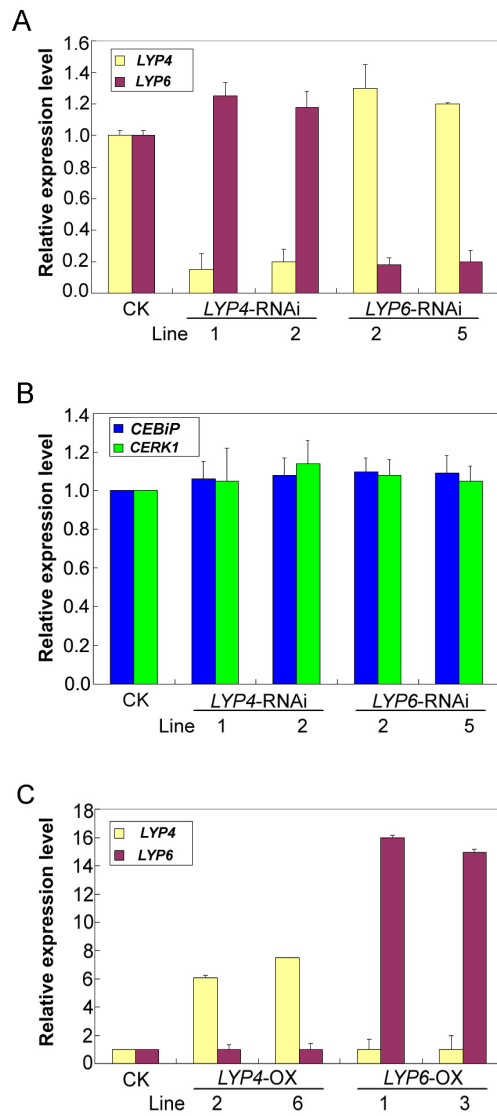

**Supplemental Figure 5. Relative Expression Levels of *LYP4*, *LYP6*, *CEBiP* and *CERK1* in *LYP* RNAi or Over-expressing (OX) Transgenic Rice.**

The transcripts of *LYP4* and *LYP6* (A) or *CEBiP* and *CERK1*(B) in different RNAi transgenic rice lines, or transcripts of *LYP4* and *LYP6* in different OX (C) transgenic rice lines were determined by qPCR. The expression level of *LYP4*, *LYP6*, *CEBiP* or *CERK1* in the empty vector transgenic rice (CK) was set as 1. The data represent means  $\pm$  SD.

**Supplemental Table 1 Primers used in this study**

| <b>Name</b>                       | <b>Sequence</b>                                |
|-----------------------------------|------------------------------------------------|
| <b><i>LYP4</i>, 6-RNAi</b>        |                                                |
| LYP4-RiH1F                        | TCT <u>AAGCTT</u> CGA AGG AGG CGT CAT G        |
| LYP4-RiP1R                        | ATA <u>CTGCAG</u> TGT GGG TGC CCT AAAA         |
| LYP4-RiM2F                        | TCT <u>ACG CGT</u> CGA AGG AGG CGT CATG        |
| LYP4-RiS2R                        | ATA <u>GTCGAC</u> TGT GGG TGC CCT AAAA         |
| LYP6-RiH1F                        | TCT <u>AAG CTT</u> CAT TGT CGC ACC TGG T       |
| LYP6-RiP1R                        | ATA <u>CTG CAG</u> ACT CTG CAC ACG AAT T       |
| LYP6-RiM2F                        | TCT <u>ACG CGT</u> CAT TGT CGC ACC TGG T       |
| LYP6-RiS2R                        | ATA <u>GTC GAC</u> ACT CTG CAC ACG AAT T       |
| <b>Promoter of <i>LYP4</i>, 6</b> |                                                |
| PLYP4-F                           | CCCAAGCTTGCTGCATAATCGTTGAC                     |
| PLYP4-R                           | CGGAATTCGGTGCTTGCAGTATCTG                      |
| PLYP6-F                           | GAGGAATTCAaCCAACCTCTGCTTATTCAGT                |
| PLYP6-R                           | <u>CTGCAG</u> ATTGGATGGAGCTTCGAGGGGGT          |
| <b>Localization</b>               |                                                |
| GFP-F                             | TCT <u>GAA TTC</u> AGA GCC ATG GGC AAA GGA GAA |
| GFP-R                             | TCT <u>GTC GAC</u> TTT GTA TAG TTC ATC CAT GCC |
| N-signal of <i>LYP4</i> -F        | AATTCTAGAATGCCACCACCCTTGCTC                    |
| N-signal of <i>LYP4</i> -R        | AATGGATCCGCAGGACTCCAGCGTGCAG                   |
| <i>LYP4</i> -F                    | <u>CTCGAGT</u> CCTCCTCTTCCACCGCCTGC            |
| <i>LYP4</i> -R                    | ATTCTCGAGTTACCACAGCAGGTTGCC                    |
| N-signal of <i>LYP6</i> -F        | <u>TCTAGA</u> ATGGCGGGGTGGCCGGCG               |
| N-signal of <i>LYP6</i> -R        | <u>GGATCCCC</u> CGCGCACGGCTCGAT                |
| <i>LYP6</i> -F                    | <u>GTCGAC</u> GCGGACACGTGCGCCGCG               |
| <i>LYP6</i> -R                    | <u>GGTACC</u> TCACATCTGGAAGTACAA               |
| <b>q PCR</b>                      |                                                |
| Actin-F                           | AGGCTCCTCTCAACCCCAAG                           |
| Actin-R                           | TTTCTGGTCATAGTCCAGG                            |
| <i>LYP4</i> -F                    | GCACAATTCTCACCACGTTAA                          |
| <i>LYP4</i> -R                    | AGTGAGTGGCAGACAAATCG                           |
| <i>LYP6</i> -F                    | ATTGCCACGTCGCTCTCCTC                           |
| <i>LYP6</i> -R                    | CAATACACACAGCCAGCAAC                           |
| MLO-F                             | GGCTTCTGGTACACCGGAGAA                          |
| MLO-R                             | TCCATTTCTTCATTTTGAGACG                         |
| Os-WRKY13F                        | AGCCCATCAAGGGCTCTCCCTAC                        |
| Os-WRKY13R                        | TCCGTCAGCCACCGGCTCAG                           |
| $\beta$ -Glu-F                    | AGCCCGACATGACCGAAGT                            |
| $\beta$ -Glu-R                    | TGGGCCGGGCCTAATCT                              |
| PAL1F                             | GGGCAACCCAGTGACCAA                             |
| PAL1R                             | CGATTGCCTCGTCGGTCTT                            |
| <b>Protein expression</b>         |                                                |
| HisLYP4-F                         | TCAGAATTCAAGTCGACGCTGGAGTCCTGCTC               |

|            |                                 |
|------------|---------------------------------|
| HisLYP4-R  | TATCTCGAGCGCCGCGGGGTGCTCGTCGG   |
| HisLYP6-F  | ATTGAATTCATCGAGCCGTGCGCGGGGGGCG |
| HisLYP6-R  | ATTCTCGAGGCCGTTTGCAGGAGAAACGTT  |
| HisCERK1-F | GAATTCAGCGCCGGGTGCGACCTCGCG     |
| HisCERK1-R | CTCGAGCCTGCTATAGCTCCTGCAGAA     |

---
